# Supplementary figures and images for: Quality control throughout the production process of Chinese herbal preparations using HPLC-DAD multiple chromatographic fingerprinting combined with HPLC/Q-TOF MS: a case study on Re Du Ning injections
Source: Royal Society of Chemistry journal article supplement (doi:10.1039/c5ay02011e), 2015-01-01

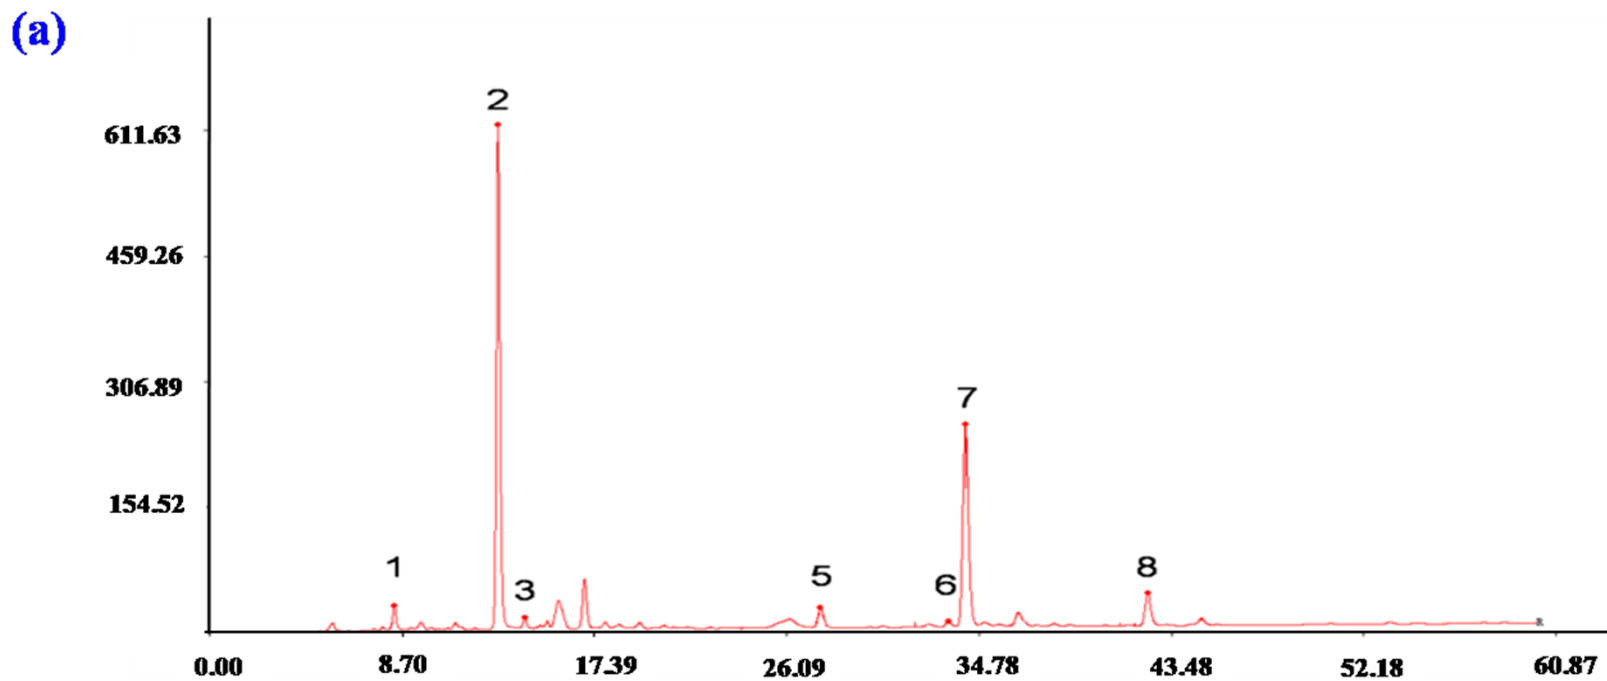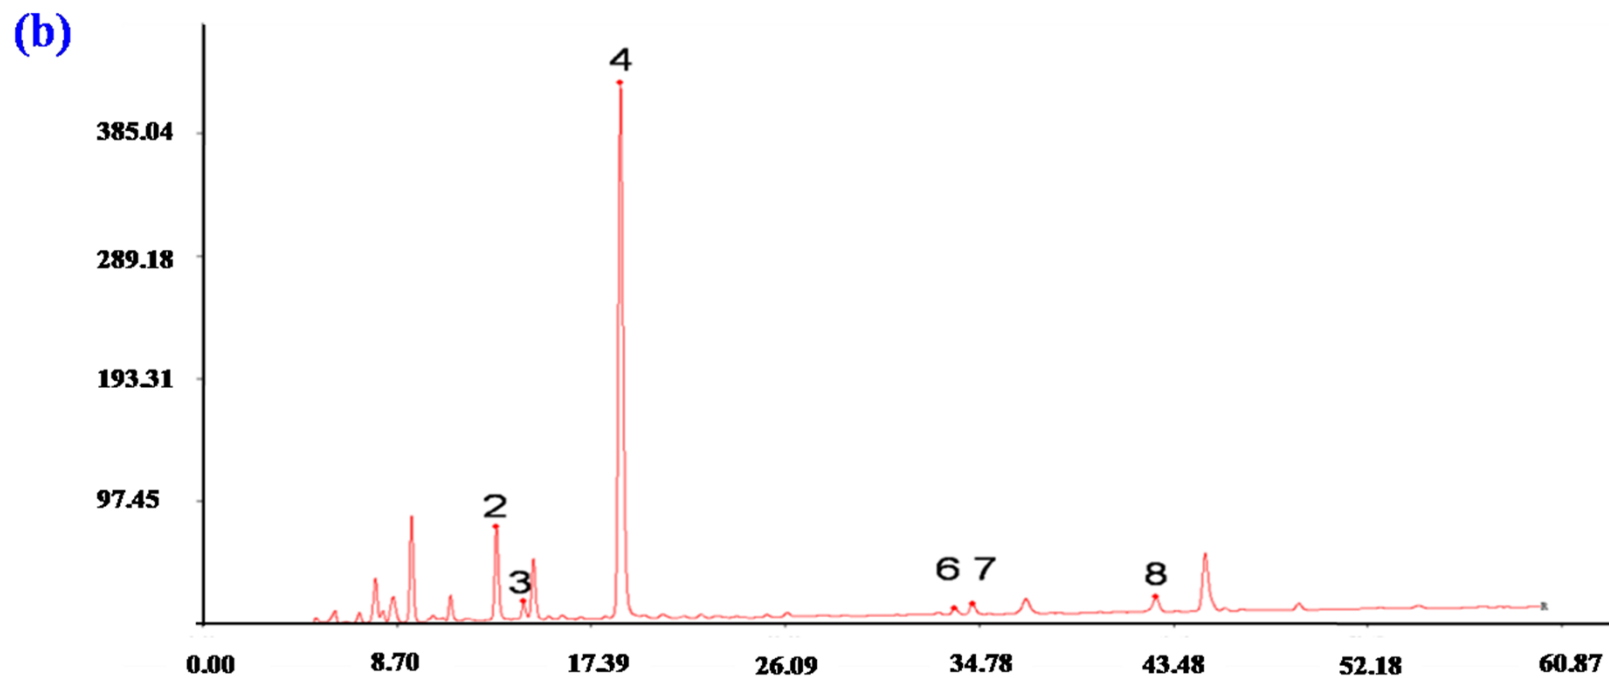

*Figure S1*

(c)

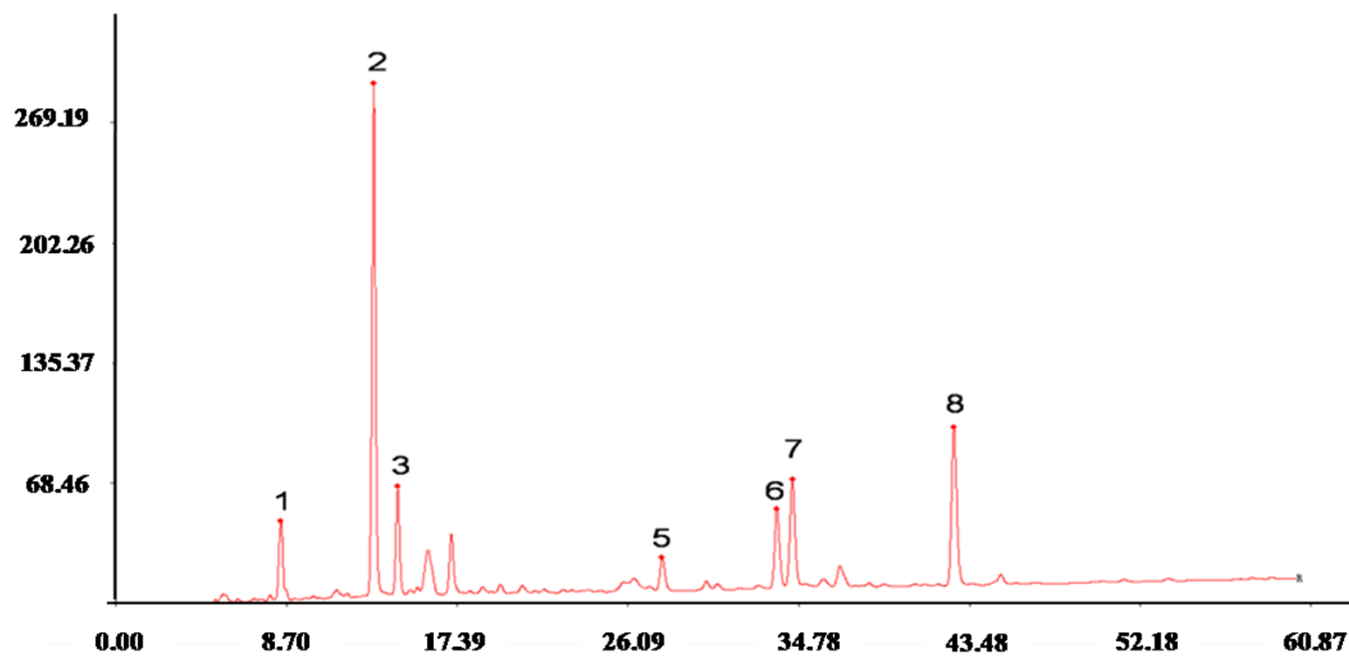

(d)

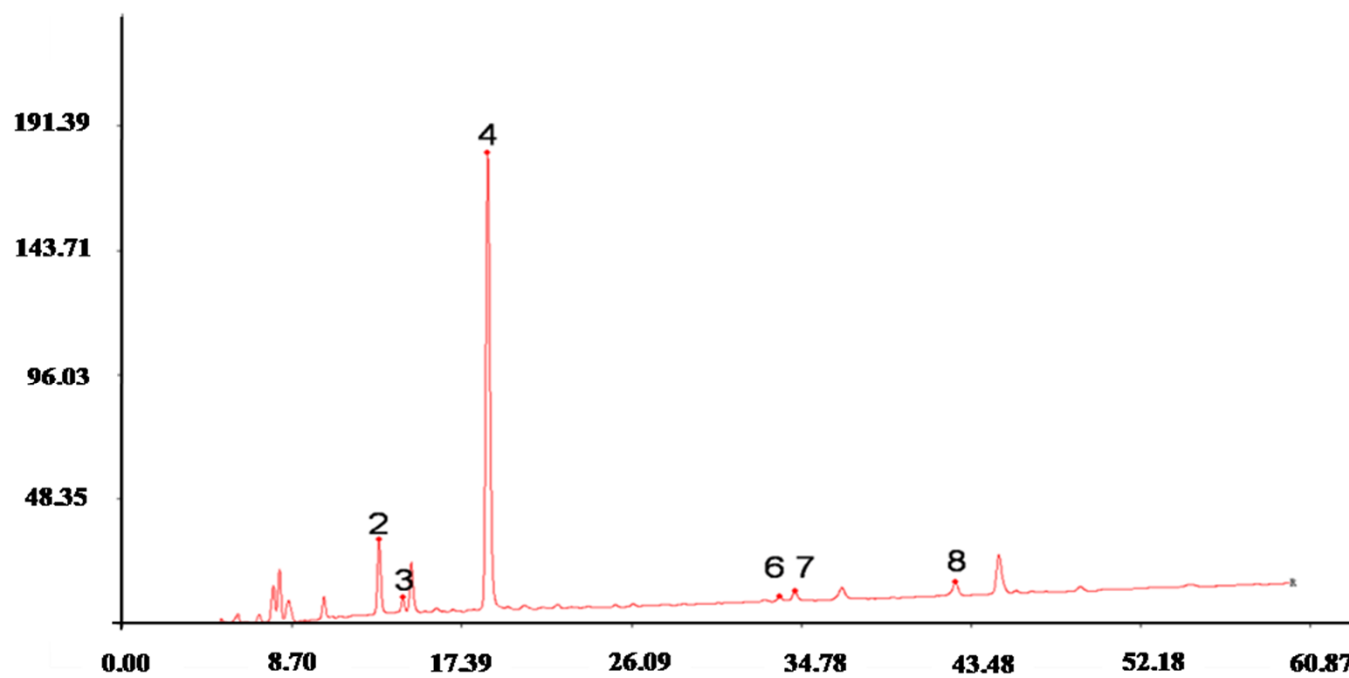

*Figure S1  
continued*

(e)

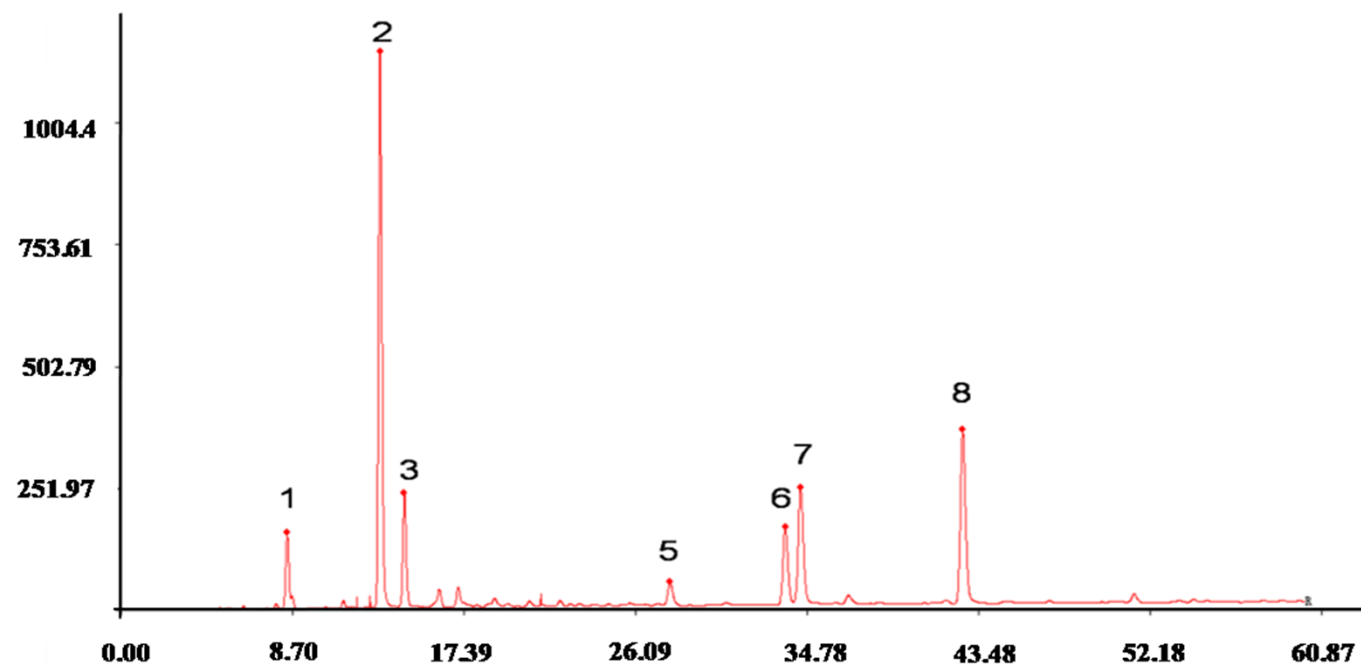

(f)

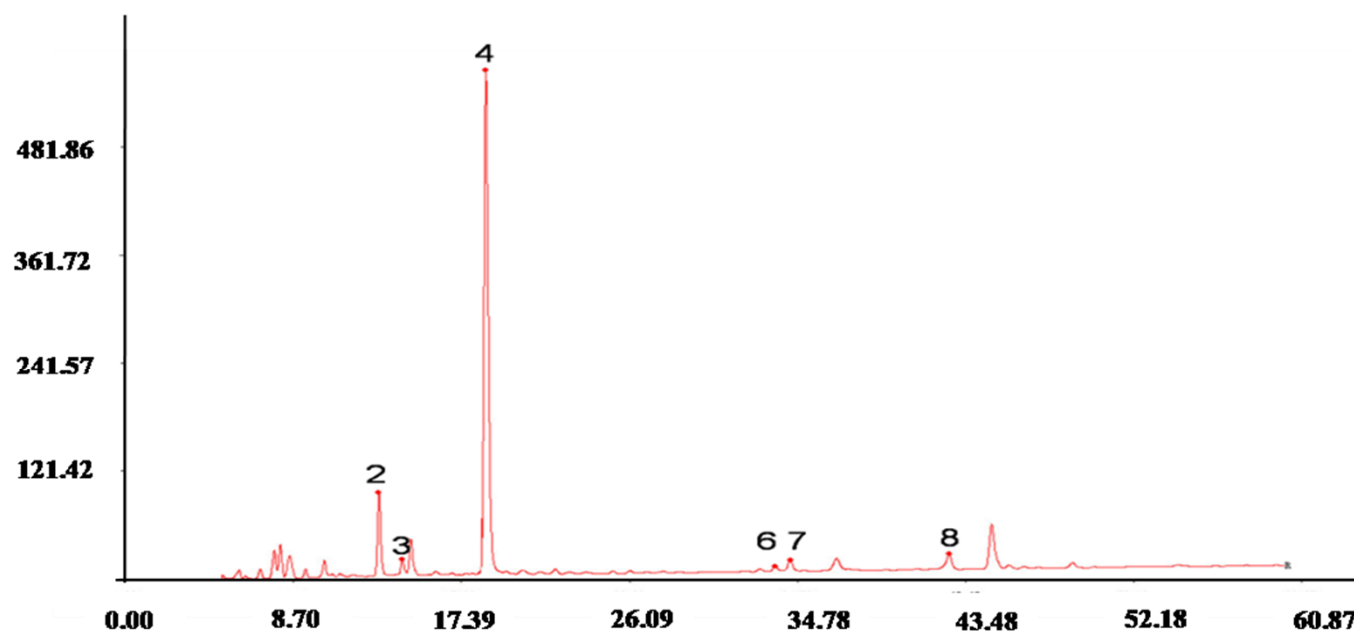

*Figure S1  
continued*

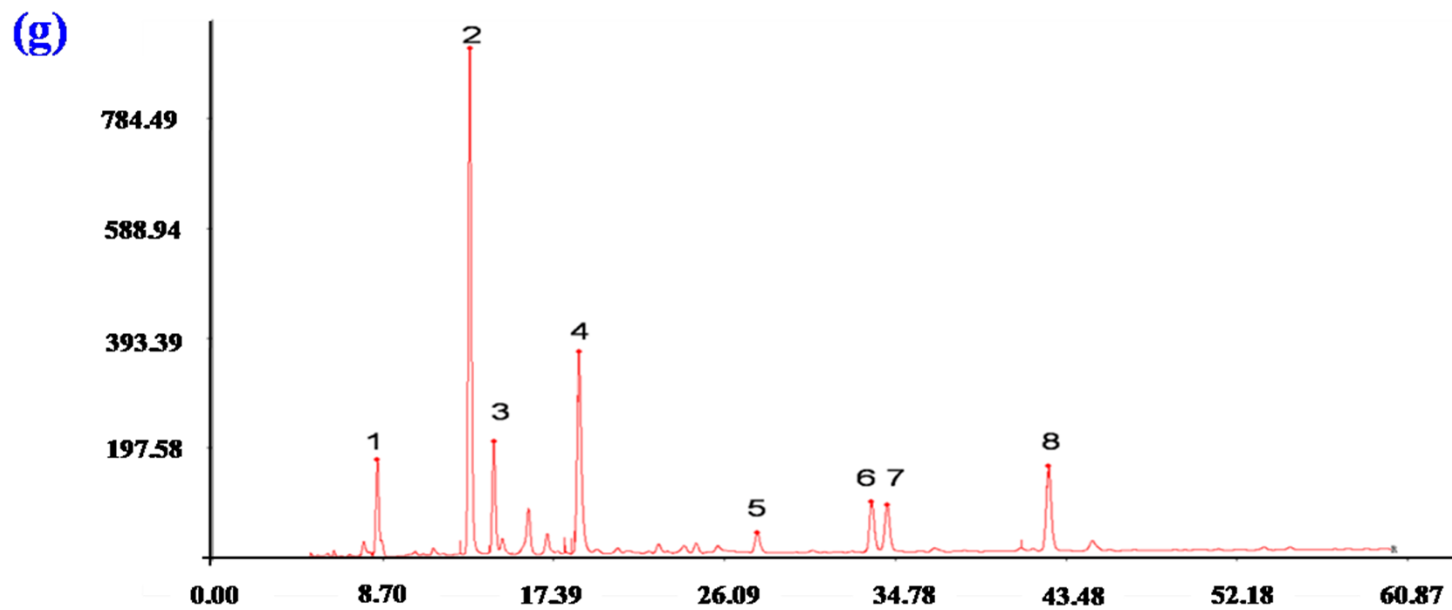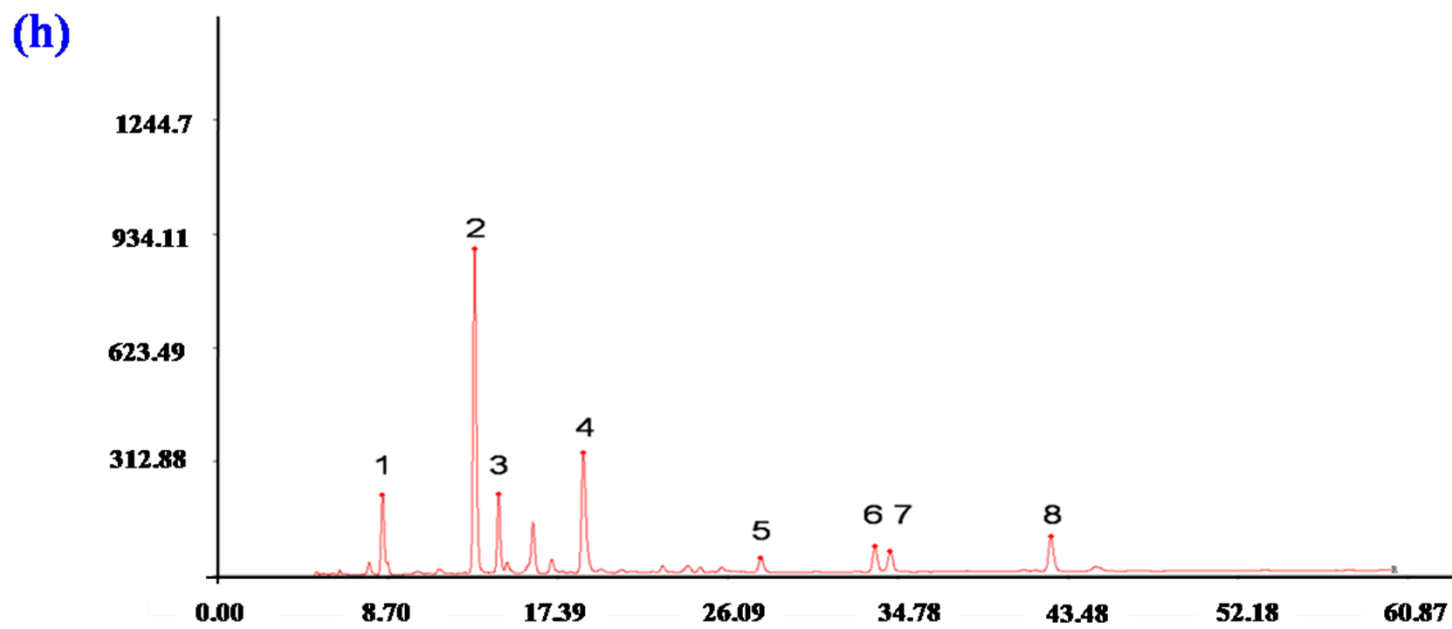

*Figure S1  
continued*

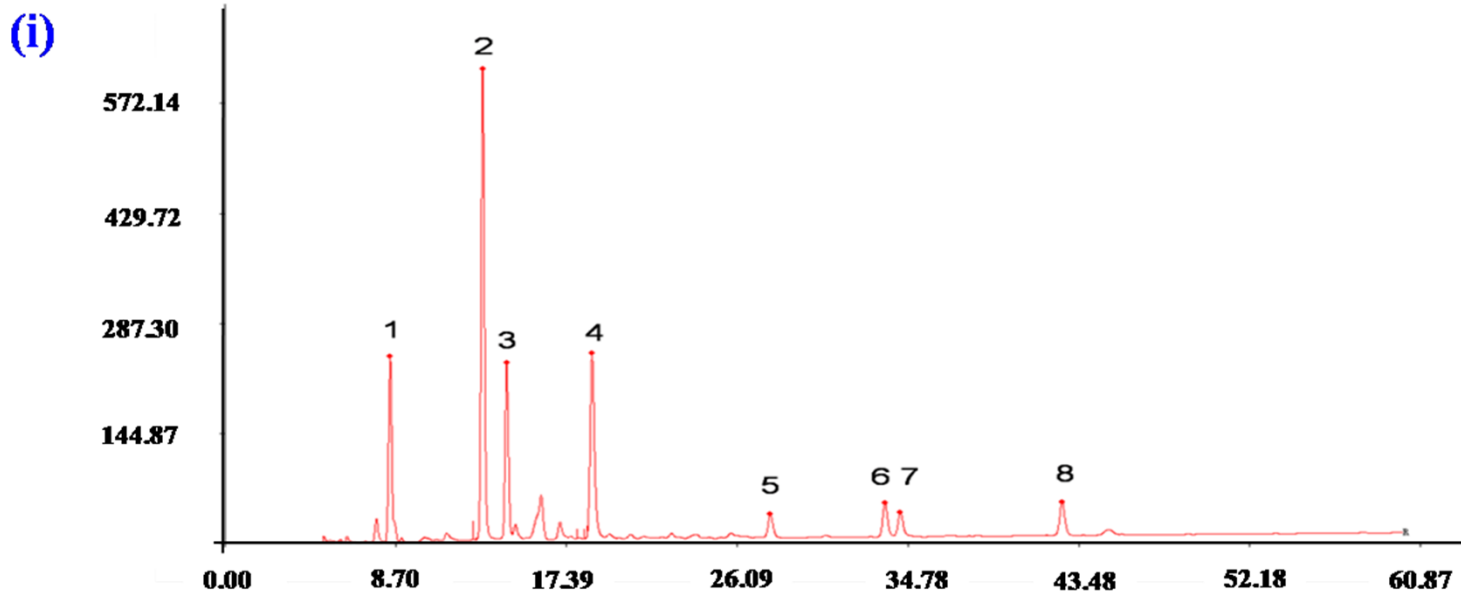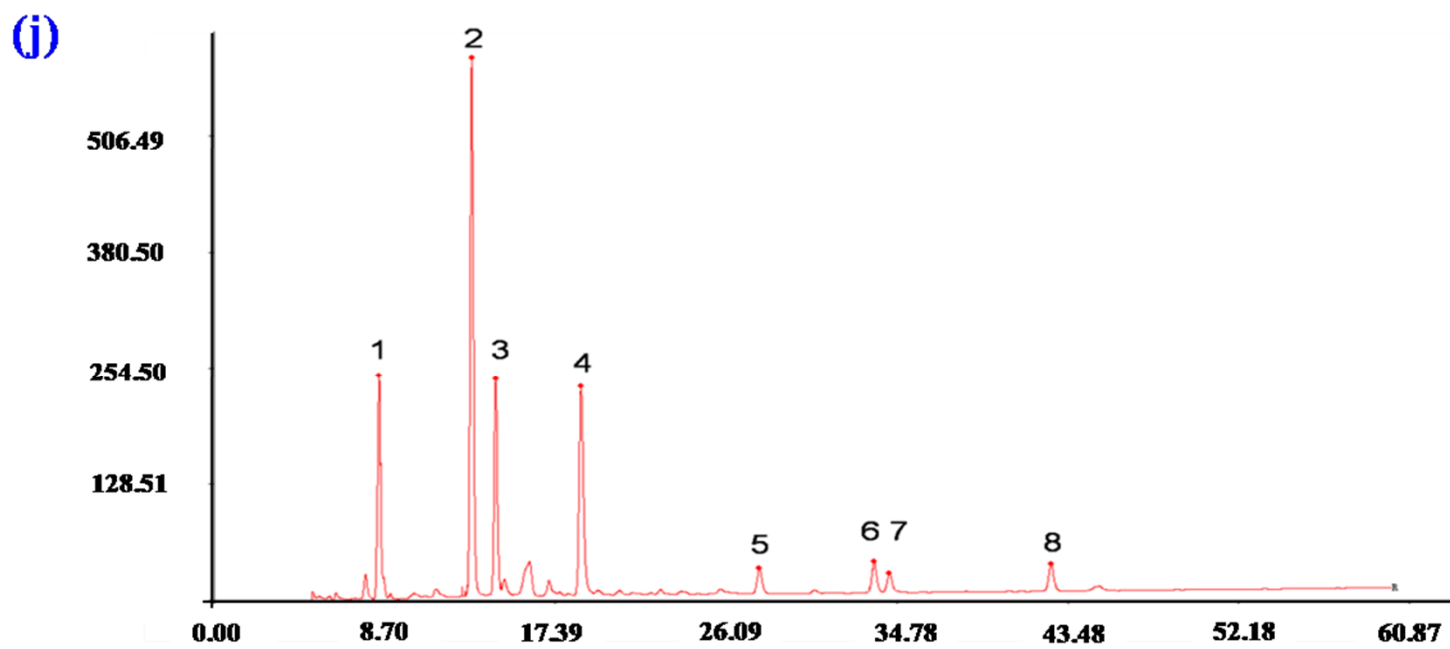

*Figure S1  
continued*

Supplement: c5ay02011e1.pdf [file c5ay02011e1.pdf]
